# Supplementary material for: Knowledge, Attitude and Practice of Pilgrims Regarding Heat-Related Illnesses during the 2017 Hajj Mass Gathering
Source: MDPI journal article supplement (doi:10.3390/ijerph16173215), 2019-09-03
Supplement: s1 [file s1]

**Table S1.** Knowledge, attitude and practice of pilgrims regarding heat-related illnesses

| Variable                                                                                                       | Category                           | <i>n</i> | %    |
|----------------------------------------------------------------------------------------------------------------|------------------------------------|----------|------|
| <b>Knowledge questions</b>                                                                                     |                                    |          |      |
| Do you believe that high atmospheric temperatures cause specific illnesses?                                    |                                    | 1795     |      |
|                                                                                                                | No                                 | 115      | 6.4  |
|                                                                                                                | Yes                                | 1451     | 80.8 |
|                                                                                                                | Don't Know                         | 229      | 12.8 |
| Did you know what the weather conditions are during the current Hajj season, before traveling to Saudi Arabia? |                                    | 1773     |      |
|                                                                                                                | No                                 | 328      | 18.5 |
|                                                                                                                | Yes                                | 1445     | 81.5 |
| Have you received any health-related information about “Heat-related Illnesses”?                               |                                    | 1786     |      |
|                                                                                                                | No                                 | 612      | 34.3 |
|                                                                                                                | Yes before travel                  | 942      | 52.7 |
|                                                                                                                | Yes upon arrival                   | 212      | 11.9 |
|                                                                                                                | Yes before and upon arrival        | 20       | 1.1  |
| Which of the following could be symptoms for heat illnesses?                                                   |                                    | 1794     |      |
|                                                                                                                | Bloody urine                       | 163      | 9.1  |
|                                                                                                                | Feeling confused                   | 818      | 45.6 |
|                                                                                                                | Muscle cramps                      | 490      | 27.3 |
|                                                                                                                | Abdominal pain                     | 386      | 21.5 |
|                                                                                                                | Visual disturbances/Blurred vision | 832      | 46.4 |
|                                                                                                                | Feeling tired or weak              | 1279     | 71.3 |
|                                                                                                                | Cough with blood                   | 127      | 7.1  |
|                                                                                                                | Dizziness                          | 1258     | 70.1 |
|                                                                                                                |                                    | 1789     |      |
| Excessive sweating causes loss in body fluids components such as minerals.                                     | No                                 | 122      | 6.8  |
|                                                                                                                | Yes                                | 1463     | 81.8 |
|                                                                                                                | Don't Know                         | 204      | 11.4 |
|                                                                                                                |                                    | 1792     |      |
| Wearing dark-colored clothes are better during hot weather                                                     | No                                 | 1322     | 73.8 |
|                                                                                                                | Yes                                | 321      | 17.9 |
|                                                                                                                | Don't Know                         | 149      | 8.3  |
|                                                                                                                |                                    | 1788     |      |
| Being thirsty is the only sign of needing to drink water                                                       | No                                 | 912      | 51.0 |
|                                                                                                                | Yes                                | 829      | 46.4 |
|                                                                                                                | Don't Know                         | 47       | 2.6  |
|                                                                                                                |                                    |          |      |

|                                                                                                                             |            |      |      |
|-----------------------------------------------------------------------------------------------------------------------------|------------|------|------|
| How much water should you drink daily during the Hajj?                                                                      |            | 1741 |      |
|                                                                                                                             | <1.5       | 54   | 3.1  |
|                                                                                                                             | 1.5-<2     | 42   | 2.4  |
|                                                                                                                             | 2-<3       | 478  | 27.5 |
|                                                                                                                             | 3-<4       | 601  | 34.5 |
|                                                                                                                             | 4-<5       | 262  | 15.0 |
|                                                                                                                             | 5-<6       | 199  | 11.4 |
|                                                                                                                             | 6<10       | 94   | 5.4  |
|                                                                                                                             | ≥10        | 11   | 0.6  |
| Do you know there is free water in holy sites?                                                                              |            | 1792 |      |
|                                                                                                                             | No         | 267  | 14.9 |
|                                                                                                                             | Yes        | 1525 | 85.1 |
| Using sunscreen reduces the risk of heat-related illnesses.                                                                 |            | 1795 |      |
|                                                                                                                             | No         | 349  | 19.4 |
|                                                                                                                             | Yes        | 1183 | 65.9 |
|                                                                                                                             | Don't Know | 263  | 14.7 |
| Performing Hajj rites in hot weather lead to the need to drink more water.                                                  |            | 1793 |      |
|                                                                                                                             | No         | 18   | 1.0  |
|                                                                                                                             | Yes        | 1734 | 96.7 |
|                                                                                                                             | Don't Know | 41   | 2.3  |
| Pilgrims with underlying health conditions (e.g. Diabetes, Hypertension) are more likely to develop heat-related illnesses. |            | 1792 |      |
|                                                                                                                             | No         | 121  | 6.8  |
|                                                                                                                             | Yes        | 1394 | 77.8 |
|                                                                                                                             | Don't Know | 277  | 15.5 |
| Older pilgrims are more likely to develop heat-related illnesses.                                                           |            | 1792 |      |
|                                                                                                                             | No         | 103  | 5.7  |
|                                                                                                                             | Yes        | 1471 | 82.1 |
|                                                                                                                             | Don't Know | 218  | 12.2 |
| High atmospheric temperatures can cause death.                                                                              |            | 1794 |      |
|                                                                                                                             | No         | 109  | 6.1  |
|                                                                                                                             | Yes        | 1385 | 77.2 |
|                                                                                                                             | Don't Know | 300  | 16.7 |
| Exposure to the sunlight during hot weather leads to fever                                                                  |            | 1797 |      |
|                                                                                                                             | No         | 234  | 13.0 |
|                                                                                                                             | Yes        | 1279 | 71.2 |
|                                                                                                                             | Don't Know | 284  | 15.8 |
| Good ventilation plays a role in cooling the atmosphere                                                                     |            | 1796 |      |

|                                                                                                           |                |      |      |
|-----------------------------------------------------------------------------------------------------------|----------------|------|------|
|                                                                                                           | No             | 84   | 4.7  |
|                                                                                                           | Yes            | 1639 | 91.3 |
|                                                                                                           | Don't Know     | 73   | 4.1  |
| Overcrowding plays a role in increasing atmospheric temperatures                                          |                | 1794 |      |
|                                                                                                           | No             | 119  | 6.6  |
|                                                                                                           | Yes            | 1577 | 87.9 |
|                                                                                                           | Don't Know     | 98   | 5.5  |
| <b>Attitude questions</b>                                                                                 |                |      |      |
| Would you drink more water during a hot day even if you are not thirsty?                                  |                | 1799 |      |
|                                                                                                           | No             | 444  | 24.7 |
|                                                                                                           | Yes            | 1355 | 75.3 |
| Would you use an umbrella in unshaded areas while performing Hajj rites?                                  |                | 1794 |      |
|                                                                                                           | No             | 578  | 33.2 |
|                                                                                                           | Yes            | 1197 | 66.7 |
|                                                                                                           | Not Applicable | 19   | 1.1  |
| While performing Hajj, if it became extremely hot, would you postpone your rites until it becomes cooler? |                | 1794 |      |
|                                                                                                           | No             | 976  | 54.4 |
|                                                                                                           | Yes            | 655  | 36.5 |
|                                                                                                           | Not Applicable | 163  | 9.1  |
| If possible, will you perform Hajj rites at night?                                                        |                | 1795 |      |
|                                                                                                           | No             | 488  | 27.2 |
|                                                                                                           | Yes            | 1162 | 64.7 |
|                                                                                                           | Not Applicable | 145  | 8.1  |
| Even if it is overcrowded, I will perform the Hajj rites following my mission schedule                    |                | 1793 |      |
|                                                                                                           | No             | 238  | 13.3 |
|                                                                                                           | Yes            | 1539 | 85.5 |
|                                                                                                           | Not Applicable | 16   | 0.9  |
| Are you willing to pay for an umbrella?                                                                   |                | 1792 |      |
|                                                                                                           | No             | 526  | 29.4 |
|                                                                                                           | Yes            | 1222 | 68.2 |
|                                                                                                           | Not Applicable | 44   | 2.5  |
| Would you use a sunscreen while performing Hajj rites during the day?                                     |                | 1790 |      |
|                                                                                                           | No             | 871  | 48.7 |
|                                                                                                           | Yes            | 858  | 47.9 |
|                                                                                                           | Not Applicable | 61   | 3.4  |
| I prefer to drink soft drinks or coffee when I feel thirsty                                               |                | 1788 |      |

|                                                                 |                |      |      |
|-----------------------------------------------------------------|----------------|------|------|
|                                                                 | No             | 1216 | 68.0 |
|                                                                 | Yes            | 504  | 28.2 |
|                                                                 | Not Applicable | 68   | 3.8  |
| <b>Practice questions</b>                                       |                |      |      |
| I dress based on the weather conditions                         |                | 1787 |      |
|                                                                 | No             | 198  | 11.1 |
|                                                                 | Yes            | 1589 | 88.9 |
| I walk in a shaded road even if it takes longer                 |                | 1786 |      |
|                                                                 | No             | 400  | 22.4 |
|                                                                 | Yes            | 1386 | 77.6 |
| I use an umbrella in unshaded areas while performing Hajj rites |                | 1789 |      |
|                                                                 | No             | 696  | 38.9 |
|                                                                 | Yes            | 1072 | 59.9 |
|                                                                 | Not Applicable | 21   | 1.2  |
| I drink water only when I feel thirsty                          |                | 1792 |      |
|                                                                 | No             | 935  | 52.2 |
|                                                                 | Yes            | 857  | 47.8 |
| My daily intake of water during Hajj (in Liters)                |                | 1730 |      |
|                                                                 | <1.5           | 86   | 5.0  |
|                                                                 | 1.5-<2         | 75   | 4.3  |
|                                                                 | 2-<3           | 532  | 30.8 |
|                                                                 | 3-<4           | 613  | 35.4 |
|                                                                 | 4-<5           | 245  | 14.2 |
|                                                                 | 5-<6           | 122  | 7.1  |
|                                                                 | 6<10           | 44   | 2.5  |
|                                                                 | ≥10            | 13   | 0.8  |
| I check for the weather forecast /bulletin before going out     |                | 1790 |      |
|                                                                 | No             | 1025 | 57.3 |
|                                                                 | Yes            | 765  | 42.7 |
| I drink soft drinks or coffee when I feel thirsty during Hajj   |                | 1793 |      |
|                                                                 | No             | 1166 | 65.0 |
|                                                                 | Yes            | 580  | 32.3 |
|                                                                 | Not Applicable | 47   | 2.6  |
| I use sunscreen while performing Hajj rites                     |                | 1795 |      |
|                                                                 | No             | 1122 | 62.5 |
|                                                                 | Yes            | 623  | 34.7 |
|                                                                 | Not Applicable | 50   | 2.8  |

|                                                                                       |                |      |      |
|---------------------------------------------------------------------------------------|----------------|------|------|
| Besides Hajj season, do you use a sunscreen in outdoor activities during a sunny day? |                | 1795 |      |
|                                                                                       | No             | 1055 | 58.8 |
|                                                                                       | Yes            | 699  | 38.9 |
|                                                                                       | Not Applicable | 41   | 2.3  |
